# Supplementary material for: Phytotoxicity and Plant Defence Induction by Cinnamomum cassia Essential Oil Application on Malus domestica Tree: A Molecular Approach
Source: MDPI journal article supplement (doi:10.3390/agronomy12020512), 2022-02-18
Supplement: s1 [file s1]

Table S2: Log 2 expression level of 29 defence genes followed by qRT-PCR

| Treatment | Bion       |            |            | CEO        |            |            | Tween80    |            |            | Water      |            |            |
|-----------|------------|------------|------------|------------|------------|------------|------------|------------|------------|------------|------------|------------|
| Day       | 1          | 2          | 3          | 1          | 2          | 3          | 1          | 2          | 3          | 1          | 2          | 3          |
| PR1       | 1.54±0.56  | 3.72±0.6   | 2.77±0.31  | 0.78±1.21  | 0.98±1.05  | 1.1±0.8    | -0.19±0.54 | 0.72±0.52  | -0.13±0.56 | -1.87±0.75 | 0.98±0.29  | -0.61±0.16 |
| PR2       | 4.24±0.47  | 2.68±0.97  | 4.9±0.33   | 0.14±0.96  | 0.76±1.14  | 0.69±0.19  | 0.92±0.51  | 1.94±0.24  | 0.81±0.69  | 0.55±0.25  | 0.26±0.51  | -0.26±0.59 |
| PR4       | 1.28±0.94  | 1.28±0.32  | 1.64±0.66  | 0.98±0.32  | 0.51±0.44  | -0.31±0.22 | 1.19±0.53  | 0.66±0.44  | 0.34±0.44  | 0.34±0.92  | 0.95±0.19  | -0.46±1.06 |
| PR5       | 3.7±0.68   | 3.19±0.41  | 3.48±0.8   | 0.37±0.35  | 0.38±0.48  | -0.8±0.5   | 0.44±0.57  | 0.74±0.55  | 0.68±0.34  | -0.14±0.54 | 0.3±0.52   | -0.38±0.83 |
| PR8       | 1.44±0.86  | 1.9±0.74   | 2.46±0.62  | 1.67±0.53  | 1.05±0.45  | 0.56±0.2   | 0.58±0.46  | 0.54±0.49  | 0.77±0.53  | -1.27±0.49 | 0.29±0.34  | -0.22±0.44 |
| PR10      | 2.75±1.08  | 4.02±1.12  | 3.21±0.94  | 3.13±0.36  | 2.83±0.77  | 1.74±0.83  | 2.01±0.39  | 2.19±0.71  | 2.1±0.77   | 0.53±0.26  | 1.89±0.44  | 0.55±0.5   |
| PR14      | 2.08±0.96  | 4.84±1.46  | 3.42±0.91  | 4.14±0.92  | 3.22±1.08  | 1.72±1.78  | 3.44±0.27  | 1.19±1     | 1.33±0.95  | -0.94±0.29 | 1.18±0.89  | -0.7±0.4   |
| AGG       | 7.95±1.28  | 7.73±0.78  | 7.29±1.43  | 1.44±1.07  | 3.75±1.09  | 1.68±0.84  | 3.92±0.39  | 4.12±0.7   | 4.59±0.2   | -1.99±0.67 | 1.87±1.97  | -0.62±0.99 |
| PAL       | 0.28±0.33  | 0.27±0.21  | 0.24±0.17  | 1.56±0.18  | 0.48±0.29  | 0.83±0.22  | 0.22±0.41  | -0.27±0.32 | 0.36±0.07  | 0.42±0.24  | 0.06±0.22  | 0.44±0.3   |
| CHS       | 0.33±0.41  | 0.4±0.39   | 0±0.38     | 1.09±0.21  | 0.61±0.42  | 0.41±0.56  | 0.18±0.22  | 0.06±0.42  | -0.11±0.66 | 0.45±0.18  | 0.12±0.4   | 0.39±0.17  |
| DFR       | 0.77±0.15  | 1.05±0.22  | 1.39±0.38  | 1.76±0.5   | 1.53±0.18  | 1.18±0.67  | 0.48±0.39  | 0.12±0.82  | 0.23±0.83  | 0.99±0.37  | 1.22±0.55  | 1.14±0.42  |
| BIS2      | 3.11±2.61  | 2.52±1.42  | 1.62±1.54  | 1.07±0.68  | 0.41±1.21  | 0.14±0.64  | 0.98±0.89  | -1.9±1.77  | -1.45±0.41 | -0.63±0.58 | -0.94±0.35 | -1.63±0.55 |
| PPO       | -0.65±0.46 | 0.64±0.6   | 0.45±0.59  | -0.2±0.86  | -0.08±0.41 | -0.41±0.7  | -0.99±1.04 | -0.35±0.57 | -0.01±0.44 | -1.68±0.06 | 0.44±0.6   | 0.04±0.85  |
| HMGR      | 0.16±0.38  | 0.18±0.36  | 0.22±0.55  | -0.95±0.19 | -0.48±0.27 | -1.23±0.37 | -0.8±0.54  | -0.89±0.74 | -0.27±0.34 | -0.89±0.56 | -0.34±0.41 | -0.94±0.4  |
| FPPS      | 1.38±0.22  | -1.87±2.72 | -1.72±2.64 | 1.25±0.45  | -3.8±3.86  | -3.26±3.2  | 0.15±0.65  | -3.19±3.75 | -1.45±2.05 | 1.14±0.47  | -1.5±2.57  | -1.67±2.62 |
| FAR       | 3.47±0.27  | 3.24±0.35  | 2.48±0.54  | 1.7±0.43   | 1.36±0.58  | -0.96±0.82 | 1.74±0.34  | 1.51±0.5   | 1.14±0.65  | 0.79±0.12  | 0.81±0.54  | -0.2±0.89  |
| CSL       | 1.72±0.27  | 1.34±0.33  | 0.55±0.59  | 1.95±0.73  | 0.55±0.63  | 0.33±0.85  | 0.18±0.75  | -0.07±0.53 | -0.02±0.8  | -0.67±0.18 | -0.45±0.62 | -0.12±0.87 |
| APOX      | 0.26±0.14  | 0.46±0.1   | 0.51±0.12  | -0.06±0.15 | -0.19±0.34 | -0.24±0.32 | 0.16±0.24  | -0.21±0.37 | 0.04±0.17  | 0.22±0.16  | 0.02±0.46  | -0.13±0.27 |
| GST       | -0.37±0.28 | -0.02±0.31 | -0.08±0.3  | 0.51±0.17  | 0.12±0.41  | -0.97±0.58 | -0.39±0.2  | -0.45±0.33 | -1.74±0.42 | -0.68±0.2  | -0.19±0.27 | -0.76±0.21 |
| POX       | 2.57±0.37  | 3.05±0.4   | 1.36±1.01  | 3.23±1.03  | 2±1.81     | 0.87±1.8   | 1.38±0.8   | 2.34±0.73  | 2.42±0.69  | -0.04±0.82 | 1.5±0.92   | -0.09±1.11 |
| CalS      | -0.11±0.13 | 0.44±0.09  | 0±0.17     | 0.32±0.04  | 0.23±0.24  | -0.43±0.25 | -0.26±0.21 | -0.37±0.65 | -0.27±0.28 | 0.19±0.27  | 0.42±0.26  | -0.35±0.08 |
| PECT      | 0.66±1.11  | 2.22±1.08  | 1.93±1.13  | 3.48±0.33  | 2.85±0.85  | 3.43±0.43  | 0.44±0.68  | -0.03±1.12 | 0.65±0.82  | -0.03±0.55 | -0.44±0.72 | -1.16±0.15 |
| CAD       | -0.46±0.24 | -0.12±0.32 | 0.23±0.23  | 0.17±0.29  | -0.3±0.14  | -0.05±0.23 | 0±0.28     | -0.1±0.29  | -0.02±0.24 | -0.19±0.37 | -0.19±0.26 | -0.32±0.2  |
| EDS1      | 2.61±0.28  | 1.62±0.73  | 2.24±0.94  | 0.53±0.36  | 1.06±0.5   | -1.34±0.98 | 0.54±0.47  | 0.65±0.84  | -1.06±1.59 | -0.36±0.54 | -1.23±0.96 | 0.33±0.48  |
| WRKY      | 0.83±1.16  | 3.34±2     | 0.99±0.93  | 0.37±0.69  | 0.48±0.47  | -0.88±1.1  | -0.71±0.48 | -0.21±0.48 | -0.28±0.37 | -2.28±0.67 | 0.7±1.79   | -1.37±0.8  |
| LOX2      | 0.09±0.12  | 0.31±0.15  | -0.28±0.33 | 0.18±0.28  | 0.3±0.27   | -0.33±0.44 | -0.16±0.28 | -0.02±0.27 | -0.13±0.44 | 0.22±0.1   | -0.02±0.19 | -0.07±0.32 |
| JAR       | -0.38±0.24 | -0.07±0.27 | 0.12±0.33  | 0.23±0.29  | -0.31±0.22 | -0.4±0.29  | -0.29±0.2  | -0.42±0.35 | -0.27±0.02 | -0.36±0.36 | -0.24±0.17 | -0.56±0.21 |
| ACCO      | -0.25±0.15 | -0.43±0.5  | -0.93±0.76 | 0.69±0.21  | 0.76±0.57  | -0.07±0.64 | -0.11±0.23 | 0.35±0.28  | -0.39±0.47 | -0.37±0.16 | -0.18±0.6  | -0.78±0.55 |
| EIN3      | -0.37±1.55 | -0.28±1.42 | 0.07±1.44  | -0.25±1.45 | -0.71±1.01 | -0.86±0.99 | -0.48±1.54 | -0.57±1.44 | -0.1±1.34  | -0.49±1.56 | -0.87±1.47 | -0.41±1.3  |
