# Supplementary material for: Phytotoxicity and Plant Defence Induction by Cinnamomum cassia Essential Oil Application on Malus domestica Tree: A Molecular Approach
Source: MDPI journal article supplement (doi:10.3390/agronomy12020512), 2022-02-18
Supplement: s1 [file s1]

Table S1: List of 29 defence genes followed by qRT-PCR

| Defence Classes and Subclasses    |                       | Defence Genes |                                                           |
|-----------------------------------|-----------------------|---------------|-----------------------------------------------------------|
|                                   |                       | Gene Codes    | Complete Names                                            |
| Chemical and/or physical barriers | PR proteins           | PR-1          | Pathogenesis-related protein 1                            |
|                                   |                       | PR-2          | Pathogenesis-related protein 2 (glucanases)               |
|                                   |                       | PR-4          | Pathogenesis-related protein 4 (hevein-like)              |
|                                   |                       | PR-5          | Pathogenesis-related protein 5 (thaumatin-like, osmotin)  |
|                                   |                       | PR-8          | Pathogenesis-related protein 8 (class III chitinase)      |
|                                   |                       | PR-10         | Pathogenesis-related protein 10                           |
|                                   |                       | PR-14         | Pathogenesis-related protein 14 (lipid transfer protein ) |
|                                   | Agglutinin            | AGG           | Agglutinin synthetase                                     |
|                                   | Phenylpropanoids      | PAL           | Phenylalanine ammonia-lyase                               |
|                                   |                       | CHS           | Chalcone synthase                                         |
|                                   |                       | DFR           | Dihydroflavonol reductase                                 |
|                                   |                       | BIS2          | Biphenyl synthase                                         |
|                                   |                       | PPO           | Polyphenol oxidase                                        |
|                                   |                       | Isoprenoids   | HMGR                                                      |
|                                   | FPPS                  |               | Farnesyl pyrophosphate synthase                           |
|                                   | Far                   |               | (E,E)-alpha-farnesene synthase                            |
|                                   | Cysteines             | CSL           | Cystein-S-lyase                                           |
|                                   | Oxidative stress      | APOX          | Ascorbate peroxidase                                      |
|                                   |                       | GST           | Glutathion S-transferase                                  |
|                                   |                       | POX           | Peroxidase                                                |
|                                   | Parietal modification | CalS          | Callose synthase                                          |
|                                   |                       | Pect          | Pectin methyl esterase                                    |
|                                   |                       | CAD           | Cinnamyl alcohol dehydrogenase                            |
|                                   | Salicylic acid (SA)   | EDS1          | Disease resistance protein EDS 1                          |
|                                   |                       | WRKY          | WRKY transcription factor 30                              |
| Hormonal signalling               | Jasmonic acid (JA)    | LOX2          | Lipoxygenase AtLOX2                                       |
|                                   |                       | JAR           | Jasmonate resistant 1                                     |
|                                   | Ethylene (ET)         | ACCO          | 1-aminocyclopropene-1-carboxylate oxidase                 |
|                                   |                       | EIN3          | EIN3-BINDING F BOX PROTEIN 1                              |
