# Supplementary material for: Phytotoxicity and Plant Defence Induction by Cinnamomum cassia Essential Oil Application on Malus domestica Tree: A Molecular Approach
Source: MDPI journal article supplement (doi:10.3390/agronomy12020512), 2022-02-18
Supplement: s1 [file s1]

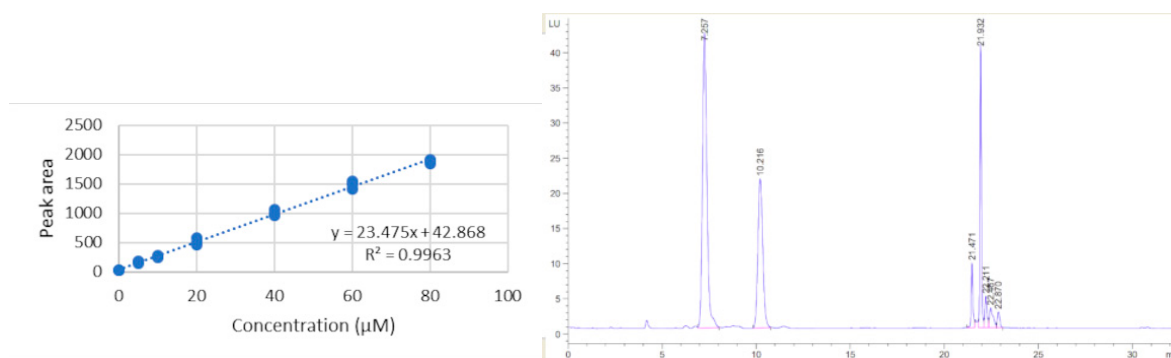

**Figure S1.** Typical HPLC--FLD sample chromatogram (RT GSH--MBB= 7.2min) (right) and calibration curve for GSH (left); Limit of detection (LOD)= 1.16 μM; Limit of quantification (LOQ)= 1.41 μM.

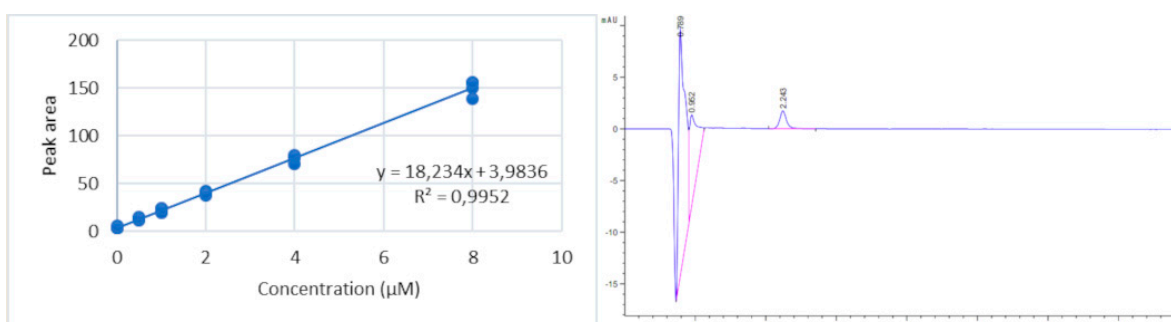

**Figure S2.** Typical HPLC--DAD sample chromatogram (RT MDA(TBA)2=2.1min) chromatogram (right) and calibration curve for MDA (left); Limit of detection (LOD)= 0.19 μM; Limit of quantification (LOQ) = 0.25 μM.
